# Supplementary material for: Super color purity green quantum dot light-emitting diodes fabricated by using CdSe/CdS nanoplatelets
Source: Royal Society of Chemistry journal article supplement (doi:10.1039/c6nr02922a), 2016-01-01
Supplement: c6nr02922a1.pdf [file c6nr02922a1.pdf]

## Supplementary Materials:

### **Super Color Purity Green Quantum Dot Light-Emitting Diodes by Using CdSe/CdS Nanoplatelets**

*Fengjuan Zhang,<sup>a</sup> Shujie Wang,<sup>a</sup> Lei Wang,<sup>a</sup> Qingli Lin,<sup>a</sup> Huaibin Shen,<sup>a\*</sup> Weiran*

*Cao,<sup>b</sup> Chenchen Yang,<sup>b</sup> Hongzhe Wang,<sup>a</sup> Long Yu,<sup>b</sup> Zuliang Du,<sup>a</sup> Jiangeng Xue,<sup>b\*</sup> and*

*Lin Song Li<sup>a\*</sup>*

<sup>a</sup> Key Laboratory for Special Functional Materials of Ministry of Education, Henan  
University, Kaifeng 475004, China

<sup>b</sup> Department of Materials Science and Engineering, University of Florida,  
Gainesville, FL 32611, USA

*E-mail: shenhuaibin@henu.edu.cn, lsli@henu.edu.cn.*

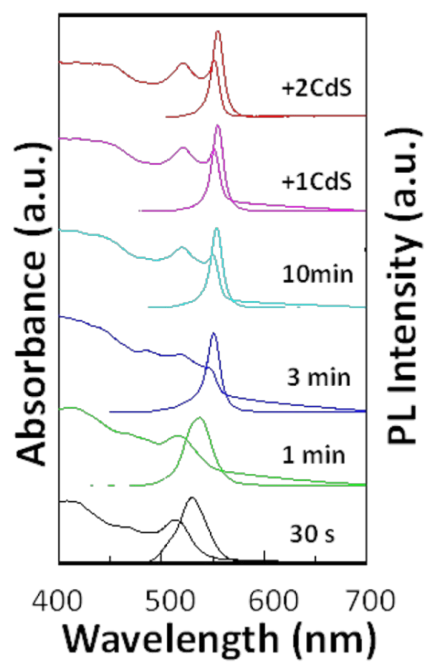

**Figure S1.** UV-vis and PL spectra of CdSe nanoplatelets with different reaction time

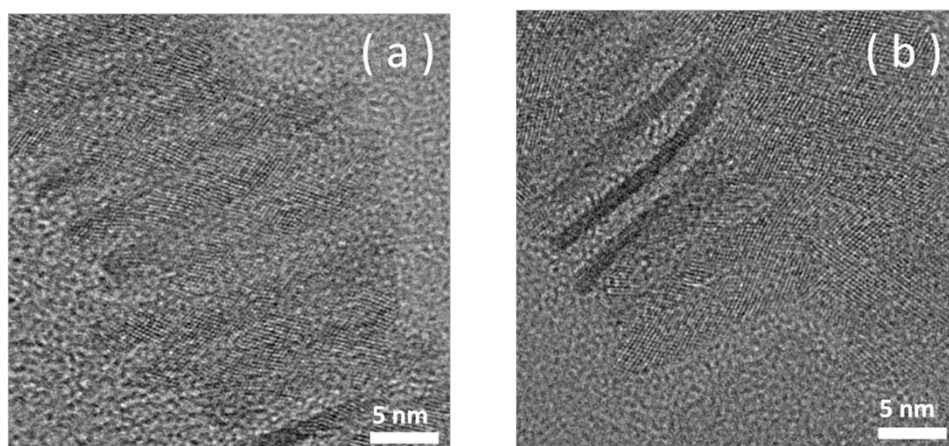

**Figure S2.** HRTEM images of CdSe and CdSe/CdS nanoplatelets

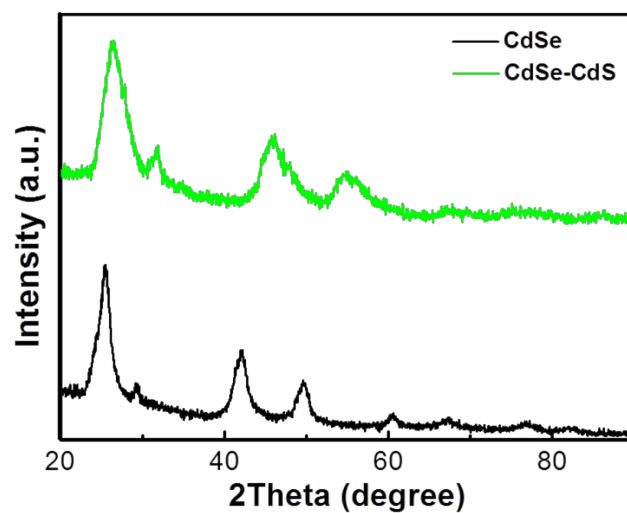

**Figure S3.** XRD pattern of CdSe and CdSe/CdS nanoplatelets

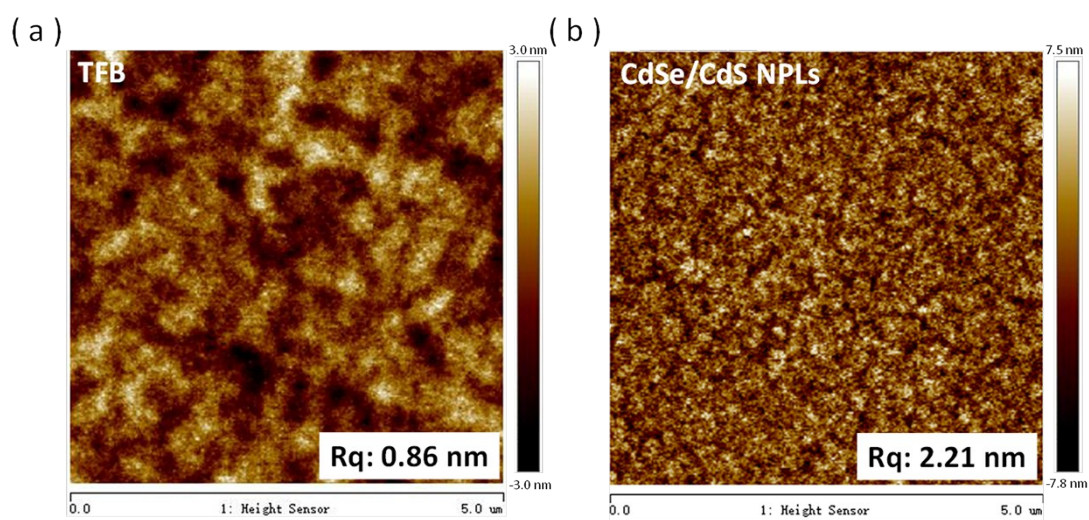

**Figure S4.** AFM characteristics of roughness ( $R_q$ ) of (a) TFB and (b) CdSe/CdS nanoplatelets layers.

ITO/PEDOT: PSS (30 nm)/TFB (40 nm)/QDs (x nm)/ZnO (30 nm)/Al (100 nm)

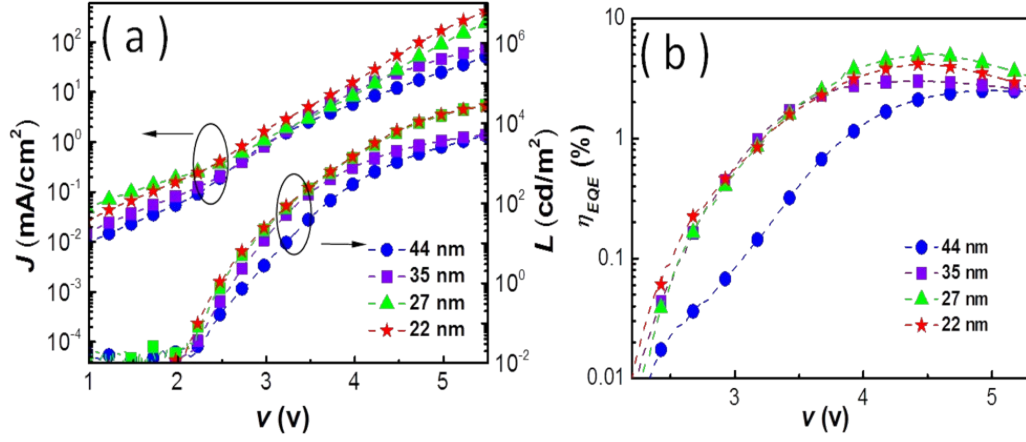

**Figure S5.** (a) Current density-voltage-luminance ( $J$ - $V$ - $L$ ) characteristics of QLED based on NPL by varying the QDs layer thickness. (b) External quantum efficiency ( $\eta_{EQE}$ ) of these devices as a function of the driving voltage.

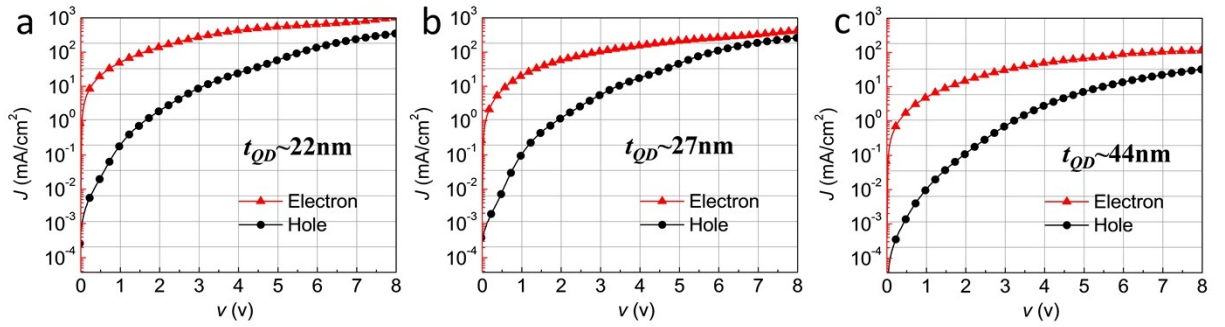

**Figure S6.** Current-density-voltage ( $J$ - $V$ ) characteristics of electron- and hole- only devices based on  $\sim 22$  nm (a), 27 nm (b), and 44 nm (c) thick QDs.

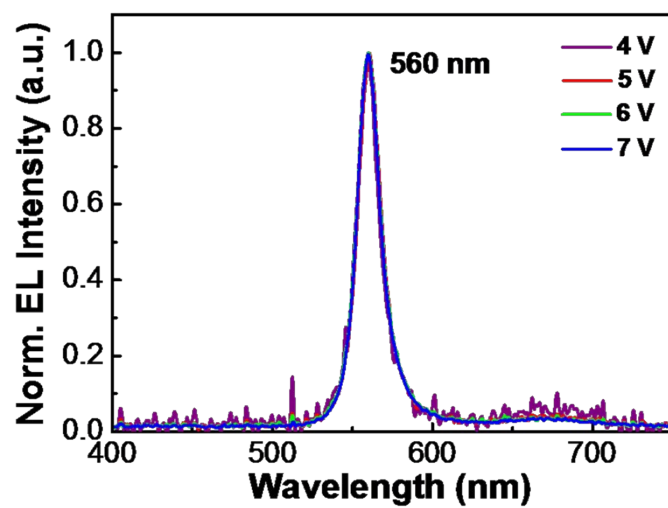

**Figure S7.** Normalize EL spectra of QLED with increasing bias voltage.
